# Supplementary material for: Rat Hepatitis E Virus: Presence in Humans in South-Western France?
Source: Front Med (Lausanne). 2021 Sep 3;8:726363. doi: 10.3389/fmed.2021.726363 (PMC8448288; doi:10.3389/fmed.2021.726363)
Supplement: Supplementary file 1 [file Table_1.xlsx]

## Sheet: Data
Sex	HBs antigen	HBs antibodies	HBc antibodies	HBV DNA	HCV antibodies	HCV RNA	HAV IgG	HAV IgM	Age (years)	Comorbidities	Bilirubin (µmol L)	Gamma-GT (IU L)	AST (IU/L)	ALT (IU/L)	HEV IgG	IgG Ratio	HEV IgM	IgM Ratio	HEV RNA	rat HEV RNA
M	negative	negative	negative		negative				58.611	Solid organ transplant	15.8	2554	68	226	positive	6.137	negative	0.041	negative	negative
M	negative	positive	negative		negative			negative	40	Bone marrow transplant	7.8	632	60	91	negative		negative		negative	negative
M	negative	negative	negative		negative			negative	72.6493	Carciac disease	23.1	116	606	549	positive	10.853	negative	0.862	negative	negative
M	negative	negative	negative	negative	negative	negative			49.1589	Bone marrow transplant	7.8	64	21	31	negative	0.011	negative	0.022	negative	negative
M	negative	negative	negative	negative	negative	negative			49	Bone marrow transplant	9.5	85	57	86	negative	0.605	negative	0.061	negative	negative
M	negative	negative	negative	negative	negative	negative			48.8301	Bone marrow transplant	9.3	152	107	256	negative	0.337	negative	0.038	negative	negative
F	negative	negative	negative		negative				33.8247	Solid organ transplant	6.1	44	52	70	negative	0.032	negative	0.296	negative	negative
F	negative	negative	negative	negative	negative	negative	negative		58.5205	Hematologic malignancy	7	26	18	26	positive	5.553	negative	0.923	negative	negative
F	negative	negative	negative		negative				49.1753	Hematologic malignancy	3.7	74	27	88	negative	0.189	negative	0.008	negative	negative
M	negative	negative	negative		negative				65.0356	Solid organ transplant	8.8	146	71	78	positive	24.371	negative	0.015	negative	negative
M	negative	positive	positive						66.2438	Bone marrow transplant	4	83	16	25	positive	16.623	negative	0.008	negative	negative
M	negative	negative	negative		negative				76	Solid organ transplant	5.5	40	25	36	positive	19.419	positive	1.068	negative	negative
M	negative	negative	negative		negative		positive		67.5534	Bone marrow transplant	13	40	18	51	negative	0.342	negative	0.007	negative	negative
F	negative	positive	negative						54.3342	Hematologic malignancy	4	71	22	53	negative	0.037	negative	0.004	negative	negative
M	negative	positive	negative		negative		positive		77.3041	Solid organ transplant	22	287	14	11	positive	26.493	positive	1.757	negative	negative
M	negative	positive	negative		negative		positive		69.5589	Bone marrow transplant	5.5	15	26	18	positive	7.521	negative	0.004	negative	negative
F									76.4959	Hematologic malignancy	7	31	34	75	positive	21.777	positive	1.742	negative	negative
F	negative	negative	negative	negative	negative	negative			80.6575	Kidney injury	5.6	822	23	28	positive	6.526	negative	0	negative	negative
F	negative	positive	negative		negative		positive		48.0986	Bone marrow transplant	8	147	31	56	positive	12.7	negative	0.291	negative	negative
M	negative	negative	negative		negative				81.9616	Solid organ transplant	34.7	373	70	121	positive	4.616	negative	0.007	negative	negative
F	negative	positive	negative		negative		positive		52.4137	Bone marrow transplant	7	28	17	25	negative	0.268	negative	0	negative	negative
F	negative	positive	positive		negative				17.0329	Solid organ transplant	3.3	13	21	28	positive	1.879	negative	0.065	negative	negative
F				negative		negative			63.1479	Bone marrow transplant	15.1	248	255	491	positive	1.353	negative	0.056	negative	negative
F				negative		negative			63.1178	Bone marrow transplant	15.1	248	255	491	positive	1.535	negative	0.056	negative	negative
M	negative	positive	negative	negative	negative	negative	positive	negative	82.5151	Carciac disease	44.5	98	6964	3201	positive	8.426	negative	0.351	negative	negative
M	negative	positive	negative	negative	negative	negative	positive	negative	82.5151	Carciac disease	85.9	75	6796	1943	positive	8.426	negative	0.351	negative	negative
F									62	Solid organ transplant	4	18	35	23	negative		negative		negative	negative
F	negative	negative	negative	negative	negative	negative	negative		62.3781	Bone marrow transplant	17.2	92	19	13	positive	19.722	negative	0.011	negative	negative
F	negative	negative	negative	negative	negative	negative	negative		62.2438	Bone marrow transplant	15.5	46	48	62	positive	19.722	negative	0.011	negative	negative
M				negative		negative		negative	23.5836	Bone marrow transplant	15.2	5926	464	1280	positive	1.737	negative	0.008	negative	negative
M	negative	positive	negative	negative	negative	negative	positive		62.4877	Hematologic malignancy	6.3	67	23	28	negative	0.595	negative	0.007	negative	negative
M	negative	positive	negative	negative	negative	negative	negative	negative	66.5178	Hematologic malignancy	6.6	353	9	22	negative	0.147	negative	0.048	negative	negative
M	negative	positive	negative	negative	negative	negative	negative	negative	66.5288	Hematologic malignancy	6.6	353	9	22	negative	0.653	negative	0.048	negative	negative
F	negative	negative	negative	negative	negative	negative		negative	43.5288	Solid cancer	13.6	196	14	24	positive	3.647	negative	0.048	negative	negative
M				negative	negative	negative		negative	18.1589	Hematologic malignancy	13.8	96	107	247	positive	20.362	negative	0.249	negative	negative
M				negative	negative	negative		negative	18.1726	Hematologic malignancy	4.7	186	188	687	positive	16.034	negative	0.176	negative	negative
M				negative	negative	negative		negative	18.1918	Hematologic malignancy	3.4	145	242	468	positive	16.034	negative	0.176	negative	negative
M	negative	positive	negative	negative	negative	negative			72.0356	Neurological disease	26.9	106	48	59	positive	4.3	negative	0.004	negative	negative
M									68.4329	Solid organ transplant	26.5	13	70	35	negative	0.242	negative	0.004	negative	negative
F	negative	negative	negative	negative	negative	negative	negative		52.4822	Bone marrow transplant	5.2	22	21	26	negative	0.095	negative	0.018	negative	negative
F	negative	negative	negative	negative	negative	negative	positive		36.3425	Bone marrow transplant	17	24	17	31	negative	0.037	negative	0.004	negative	negative
M	negative	positive	negative	negative	negative	negative		negative	29.7315	Hematologic malignancy	16	59	15	54	positive	15.057	negative	0.159	negative	negative
M				negative		negative			54.8658	Solid organ transplant	5.4	79	70	72	positive	22.703	negative	0.011	negative	negative
M				negative		negative			20.3452	Bone marrow transplant	100.8	420	331	405	negative	0.05	negative	0.011	negative	negative
F									51.6685	Hematologic malignancy	7.4	114	151	347	negative	0.005	negative	0.019	negative	negative
M				negative		negative		negative	63.789	Bone marrow transplant	22.9	98	38	41	positive	4.953	negative	0.037	negative	negative
M	negative	positive	negative	negative	negative	negative	positive		73.1616	Bone marrow transplant	4.8	80	12	20	positive	5.368	negative	0.032	negative	negative
M	negative	negative	negative	negative	negative	negative	positive		63.1671	Bone marrow transplant	10	92	46	90	positive	7.495	negative	0.025	negative	negative
M	negative	positive	negative	negative	negative	negative			51.2137	Solid organ transplant	5.6	18	40	42	positive	24.589	positive	20.077	negative	negative
F	negative	positive	negative		negative				78.6	Solid organ transplant	24	24	39	39	positive	20.749	positive	1.097	negative	negative
F	negative	positive	negative	negative	negative	negative	positive	negative	74.0822	Hematologic malignancy	10.8	84	12	29	positive	11.058	negative	0.047	negative	negative
M	negative	positive	negative	negative	negative	negative	positive		39.9397	Bone marrow transplant	36.7	766	102	163	positive	8.4	negative	0.011	negative	negative
M	negative	positive	negative	negative	negative	negative	positive		39.9616	Bone marrow transplant	36.7	766	102	163	positive	5.558	negative	0.008	negative	negative
F	negative	positive	negative	negative	negative	negative			58.5479	Hematologic malignancy	4.9	101	51	89	negative	0.011	negative	0.025	negative	negative
M	negative	positive	negative	negative	negative	negative	positive		23.1151	Bone marrow transplant	7.3	36	30	34	negative	0.026	negative	0.007	negative	negative
M	negative	positive	negative	negative	negative	negative	positive		23.4548	Bone marrow transplant	4	68	15	42	negative	0.011	negative	0.004	negative	negative
M	negative	negative	negative	negative	negative	negative	positive		61.1534	Bone marrow transplant	43	31	38	65	positive	6.174	negative	0.015	negative	negative
F	negative	positive	positive		negative				53.8356	Solid organ transplant	8.3	192	36	78	negative	0.011	negative	0.985	negative	negative
M				negative		negative			30.6521	Hematologic malignancy	5.7	72	159	165	negative	0.021	negative	0.012	negative	negative
F	negative					negative			63.1178	Solid organ transplant					positive	11.353	negative		negative	negative
M									50.3452	Hematologic malignancy					negative	0.216	negative	0.015	negative	negative
F	negative	negative	negative		negative				32.9178	Paroxysmal nocturnal hemoglobinuria	39.2	169	43	44	positive	6.258	negative	0.012	negative	negative
M	negative	negative	negative	negative	negative	negative			56.5041	Solid organ transplant	4.2	389	29	34	negative	0.016	negative	0.008	negative	negative
M				negative		negative			61.8493	Bone marrow transplant	42.1	682	42	212	positive	13.794	negative	0.012	negative	negative
F	negative	positive	negative	negative	negative	negative	positive		55	Bone marrow transplant	6.9	68	17	29	negative	0.116	negative	0.343	negative	negative
F									68.611	Solid organ transplant					positive	1.511	positive	1.184	negative	negative
M	negative	negative	positive	negative					49.5397	Sickle-cell anemia	4.8	424	73	49	negative	0.011	negative	0.07	negative	negative
F	negative	positive	negative	negative	negative	negative	positive		53.4219	Bone marrow transplant	19	47	19	23	positive	0.011	negative	0.015	negative	negative
M	negative	negative	negative		negative				68.3288	Type 2 diabetes	7.3	330	56	66	negative	0.016	negative	0.646	negative	negative
M	negative	positive	negative	negative	negative	negative	positive		29.6329	Bone marrow transplant	6	406	28	23	positive	3.305	negative	0.045	negative	negative
F	negative	positive	negative	negative	negative	negative	positive		38.7479	Hematologic malignancy	5	199	34	73	negative	0.021	negative	0.033	negative	negative
M				negative		negative			57.5123	Bone marrow transplant	11.7	231	10	50	negative	0.242	negative	0.238	negative	negative
F									54.9479	Hematologic malignancy	9	569	130	148	positive	1.658	negative	0	negative	negative
M	negative	negative	negative		negative				29.5945	Hematologic malignancy	10	54	31	86	positive	3.142	negative	0.012	negative	negative
M	negative	negative	negative		negative				29.5288	Hematologic malignancy	14	92	127	479	positive	1.837	negative		negative	negative
M	negative	negative	negative		negative				29.3836	Hematologic malignancy	13.2	175	681	1510	positive	4.737	negative	0.012	negative	negative
M									59.0411	Solid organ transplant					negative	0.679	negative	0.012	negative	negative
F				negative		negative			47.4384	Bone marrow transplant	16	1561	96	310	positive	2.826	positive	19.671	negative	negative
F	negative	negative	negative		negative			negative	68.8438	Solid organ transplant	4	118	20	59	negative	0.837	positive	18.637	negative	negative
M	negative	positive	negative						36.8658	Solid organ transplant	3.5	45	25	25	positive	1.489	negative	0.463	negative	negative
M	negative	positive	negative						36.9726	Solid organ transplant	4.9	39	18	21	positive	1.121	negative	0.373	negative	negative
M	negative	positive	negative						37.1452	Solid organ transplant	5.7	133	27	46	negative	0.589	negative	0.319	negative	negative
F	negative	positive	negative	negative	negative	negative	positive		24.8082	Bone marrow transplant	9.7	98	30	32	negative	0.047	negative	0.011	negative	negative
F	negative	negative	negative		negative		positive	negative	71.3973	Solid organ transplant	86.7	728	1558	674	negative	0.021	negative	0.000	negative	negative
F				negative		negative			39.1836	Solid organ transplant	7	251	19	33	negative	0.016	negative	0.015	negative	negative
M				negative		negative			61.4384	Hematologic malignancy	4.8	73	18	22	positive	19.065	positive	1.386	negative	negative
M				negative		negative			61.4521	Hematologic malignancy	4.8	73	18	22	positive	19.065	positive	1.489	negative	negative
M	negative	positive	negative	negative	negative	negative	positive		46.2986	Bone marrow transplant	9.8	91	22	39	positive	5.932	negative	0.015	negative	negative
M	negative	positive	negative	negative	negative	negative	negative		63.6849	Bone marrow transplant	2.5	41	26	43	positive	6.526	negative	0.057	negative	negative
M	negative	positive	negative	negative	negative	negative	negative		34.0548	Bone marrow transplant	14	23	31	57	positive	8.837	negative	0.0265	negative	negative
M									47.2959	Solid organ transplant	4.6	25	43	41	positive	18.897	negative	0.099	negative	negative
M	negative	positive	negative	negative	negative	negative	positive	negative	61.5342	Solid organ transplant	11.6	595	166	240	negative	0.026	negative	0.004	negative	negative
M	negative	positive	negative	negative	negative	negative	positive	negative	61.6137	Solid organ transplant	18.8	438	84	211	negative	0.021	negative	0.011	negative	negative
M	negative	positive	negative	negative	negative	negative	positive	negative	61.7479	Solid organ transplant	12.5	1132	134	359	negative	0.011	negative	0.011	negative	negative
F	negative	negative	negative	negative	negative	negative			67.7918	Bone marrow transplant	22	287	792	1469	negative	0.005	negative	0.008	negative	negative
F	negative	positive	negative	negative	negative	negative	positive		56.0192	Bone marrow transplant	7	71	40	58	positive	3.242	negative	0	negative	negative
F	negative	positive	negative	negative	negative	negative	positive		55.9041	Bone marrow transplant	7	22	24	41	positive	3.242	negative	0	negative	negative
F	negative	positive	negative	negative	negative	negative	positive		69.1425	Bone marrow transplant	5	30	24	89	positive	2.821	negative	0.007	negative	negative
F	negative	positive	negative	negative	negative	negative	positive		69.3808	Bone marrow transplant	4	85	54	64	positive	2.242	negative	0.011	negative	negative
F	negative	negative	negative		negative				21	Solid cancer	18	79	19	43	negative		negative		negative	negative
M	negative	positive	negative	negative	negative	negative	positive		60.2932	Bone marrow transplant	9.1	30	7	22	positive	5.126	negative	0.011	negative	negative
M	negative	positive	negative	negative	negative	negative	positive		61	Bone marrow transplant	9.1	30	7	22	positive	5.126	negative	0.011	negative	negative
M	negative	positive	negative	negative	negative	negative	positive		60	Bone marrow transplant	10	27	26	56	positive	5.126	negative	0.011	negative	negative
M	negative	positive	negative	negative	negative	negative	positive		60	Bone marrow transplant	10	27	26	56	positive	5.126	negative	0.011	negative	negative
M	negative	positive	negative	negative	negative	negative	positive		60	Bone marrow transplant	10	27	26	56	positive	5.126	negative	0.011	negative	negative
M	negative	positive	negative	negative	negative	negative	positive		60	Bone marrow transplant	10	27	26	56	positive	5.126	negative	0.011	negative	negative
M									63.9973	Solid organ transplant	13.5	439	65	264	positive	8.647	negative	0.004	negative	negative
F	negative	positive	negative	negative	negative	negative	positive		30.0493	Bone marrow transplant	10	27	24	38	positive	2.932	negative	0.049	negative	negative
M	negative	negative	negative		negative				53.137	Solid organ transplant	4.4	26	27	26	positive	19.823	positive	4.073	negative	negative
M									64.8137	Hematologic malignancy	7	41	25	46	negative		negative		negative	negative
M									59.5151	Solid organ transplant	6.5	106	44	115	positive	9.942	negative	0.001	negative	negative
M									48.1288	Solid organ transplant					positive	7.142	positive	2.128	negative	negative
M									45.789	Solid organ transplant					negative	0.005	negative	0.004	negative	negative
F				negative		negative			22.0932	Bone marrow transplant	5.2	436	80	97	negative	0.037	negative	0.008	negative	negative
M	negative	positive	negative	negative	negative	negative	positive		44.3781	Hematologic malignancy	4	58	24	65	negative	0.216	negative	0.004	negative	negative
M	negative	positive	negative	negative	negative	negative	positive		30.3726	Bone marrow transplant	74	109	48	103	negative	0.616	negative	0.008	negative	negative
F	negative	positive	negative	negative	negative	negative	positive		65.7781	Bone marrow transplant	5.4	25	28	13	positive	1.884	negative	0.011	negative	negative
F	negative	positive	negative	negative	negative	negative	positive		65.9534	Bone marrow transplant	4.2	73	62	81	positive	1.463	negative	0.004	negative	negative
M				negative		negative		negative	58.3178	Solid organ transplant	20	193	69	146	negative	0	negative	0.019	negative	negative
F				negative		negative			63.1507	Solid organ transplant	7.6	427	86	170	negative	0	negative	0.015	negative	negative
M	negative	negative	negative		negative		positive		69.2712	Solid organ transplant	11.3	239	13	16	positive	25.651	positive	21.447	negative	negative
M	negative	negative	negative		negative		positive		69.2329	Solid organ transplant	15.2	430	15	27	positive	25.651	positive	21.447	negative	negative
M	negative	negative	negative		negative		positive		69.2137	Solid organ transplant	10.1	226	20	31	positive	25.651	positive	21.447	negative	negative
M	negative	negative	negative		negative				53.1014	Solid organ transplant	10.1	478	59	62	positive	5.484	positive	9.659	negative	negative
M	negative	positive	negative		negative				86	Neurological disease	19.4	734	244	395	negative		positive	6.46	negative	negative
M	negative	positive	negative		negative				86	Neurological disease	19.4	734	244	395	negative		positive	6.46	negative	negative
M									70.1808	Solid organ transplant	91.8	437	583	303	negative	0.026	negative	0	negative	negative
M	negative	negative	negative			negative			69.4055	Solid organ transplant	5.8	312	45	46	positive	10.542	negative	0.011	negative	negative
F	negative	positive	negative		negative			negative	43.2795	Solid organ transplant	5.6	22	18	27	negative	0.011	negative	0.057	negative	negative
M				negative		negative			45.8712	Hematologic malignancy	9.6	630	104	121	positive	5.321	negative	0.627	negative	negative
F				negative		negative		negative	58.011	Solid organ transplant	11.3	143	243	244	negative	0.774	negative	0.007	negative	negative
F				negative		negative			63.9945	Hematologic malignancy	8	808	74	91	negative	0.05	negative	0.008	negative	negative
M	negative	positive	negative	negative	negative	negative	positive		70.6027	Hematologic malignancy	16	161	38	81	negative	0.821	negative	0.011	negative	negative
M	negative	positive	negative		negative				77.2329	Solid cancer	22.2	451	40	20	negative	0.011	negative	0.015	negative	negative
F	negative	positive	negative		negative				79.4137	Solid organ transplant	3.6	197	27	35	negative		negative		negative	negative
F					negative	negative			66.3671	Solid organ transplant	4.1	17	10	14	positive	4.526	negative	0.008	negative	negative
M				negative					47.8904	Solid organ transplant	14.3	83	25	23	positive	22.956	negative	0.031	negative	negative
M	negative	negative	negative		negative				70.5616	Hematologic malignancy	6	45	32	53	positive	9.874	negative	0.008	negative	negative
M				negative		negative			34.8301	Bone marrow transplant	12.3	171	27	84	negative	0.789	negative	0.008	negative	negative
M				negative		negative			34.8877	Bone marrow transplant	12.3	171	27	84	negative	0.789	negative	0.008	negative	negative
M	negative	negative	negative		negative				50.526	Solid organ transplant	4.4	40	15	26	negative	0.016	negative	0.018	negative	negative
M	negative	positive	negative		negative				47.1397	Solid organ transplant	12.8	428	116	72	negative	0.011	negative	0.012	negative	negative
M				negative		negative			51.211	Hematologic malignancy	6.5	365	91	258	negative	0.511	negative	0	negative	negative
M	negative	negative	negative		negative				55.9425	Hematologic malignancy	47	228	39	81	negative		negative		negative	negative
M	negative	negative	negative	negative	negative	negative	positive		65.1616	Bone marrow transplant	3	66	27	35	negative	0.026	negative	0.007	negative	negative
F	negative	negative	negative	negative	negative	negative	positive		43.1616	Hematologic malignancy	6	29	25	29	negative	0	negative	0.029	negative	negative
F	negative	positive	negative	negative	negative	negative	negative		53.2795	Bone marrow transplant	7.8	17	30	42	positive	9.716	negative	0.011	negative	negative
M				negative		negative			25.2356	Bone marrow transplant	32.4	840	128	78	negative	0.584	negative	0.007	negative	negative
M				negative		negative			25.1068	Bone marrow transplant	18	1030	47	175	negative	0.5	negative	0.004	negative	negative
F	negative	positive	negative		negative				70.3014	Hematologic malignancy	6.7	22	21	16	positive	15.798	negative	0.794	negative	negative
M	negative	positive	negative	negative	negative	negative		negative	42.3644	Bone marrow transplant	5.4	100	137	34	negative	0.216	negative	0.147	negative	negative
M	negative	negative	negative		negative			negative	55.3753	Solid organ transplant	9.5	58	15	15	negative	0.021	negative	0.007	negative	negative
M	negative	negative	negative		negative			negative	55.3014	Solid organ transplant	28.1	509	25	36	negative	0.005	negative	0.007	negative	negative
M	negative	negative	negative	negative	negative	negative	negative		39.6356	Bone marrow transplant	10	358	20	33	negative	0.605	negative	0.022	negative	negative
F	negative	negative	negative		negative	negative			38.1616	Solid organ transplant	3.1	217	13	15	negative	0.016	negative	0.000	negative	negative
F	negative	negative	negative		negative				53.7315	Carciac disease	7.9	104	97	134	negative	0.016	negative	0.011	negative	negative
M				negative		negative			28.5041	Hematologic malignancy	5	205	33	72	negative	0.005	negative	0.008	negative	negative
M				negative		negative			28.5233	Sickle-cell anemia	12	626	121	258	negative	0.005	negative	0.012	negative	negative
M									59	Solid organ transplant				329	negative		negative		negative	negative
F	negative	negative	negative		negative				61.0712	Solid organ transplant	13	381	65	185	negative	0.005	negative	0	negative	negative
M	negative	positive	negative		negative				45.4274	Solid organ transplant	14.6	56	24	33	positive	27.638	negative	0.023	negative	negative
M	negative	positive	negative	negative	negative	negative	positive		22.5562	Bone marrow transplant	5.8	27	35	33	negative	0.174	negative	0.22	negative	negative
M	negative	positive	negative	negative	negative	negative	positive		22.7205	Bone marrow transplant	13	28	30	31	negative	0.174	negative	0.22	negative	negative
F	negative	negative	negative		negative				24.1014	Solid organ transplant	6.7	137	16	30	negative	0.021	negative	0.007	negative	negative
F	negative	positive	negative		negative		positive		34.0466	Hematologic malignancy	4	24	21	33	negative	0.011	negative	0.021	negative	negative
M	negative	negative	negative	negative	negative	negative			56.7863	Hematologic malignancy	11.3	119	69	170	positive	4.011	negative	0.004	negative	negative
F	negative	negative	negative	negative	negative	negative	positive		25.9151	Bone marrow transplant	11.8	207	33	70	negative	0.3	negative	0.047	negative	negative
F	negative	negative	negative	negative	negative	negative	positive		25.8	Bone marrow transplant	11	93	25	46	negative	0.3	negative	0.047	negative	negative
F	negative	negative	negative	negative	positive	negative			54.9836	Solid organ transplant					negative	0.032	negative	0.007	negative	negative
F	negative	positive	negative	negative	negative	negative	positive		64.5205	Bone marrow transplant	8	71	47	83	positive	4.021	negative	0.195	negative	negative
F	negative	positive	negative	negative	negative	negative			51.0959	Bone marrow transplant	5	155	119	310	positive	10.974	negative	0.034	negative	negative
F	negative	positive	negative	negative	negative	negative			51.0822	Bone marrow transplant	9.6	174	150	372	positive	2.35	negative	0.096	negative	negative
F	negative	positive	negative	negative	negative	negative	positive		57.7205	Bone marrow transplant	5	223	51	65	positive	7.353	negative	0.004	negative	negative
M				negative					51.6219	Solid organ transplant	128	145	5119	3255	negative	0.011	negative	0.008	negative	negative
M				negative					51.6795	Solid organ transplant	454.6	470	96	174	negative	0.268	negative	0	negative	negative
F				negative		negative			65.9616	Hematologic malignancy	3.4	139	36	55	positive	24.926	negative	0.077	negative	negative
F	negative	positive	negative		negative				52.7014	Cirrhosis	23.5	644	23	54	negative	0.021	negative	0	negative	negative
M				negative		negative			48.3014	Hematologic malignancy	3.1	65	39	74	negative	0.026	negative	0.008	negative	negative
F	negative	positive	negative		negative		positive		48	Kidney injury	4.6	298	79	129	negative	0.005	negative	0.027	negative	negative
M	negative	negative	negative	negative	negative	negative	negative		67.6274	Solid cancer	11	18	17	22	negative	0.247	negative	0.008	negative	negative
F	negative	positive	negative	negative	negative	negative	positive		30.7068	Bone marrow transplant	6.8	16	121	20	negative	0.137	negative	0.034	negative	negative
M				negative		negative			38.9863	Bone marrow transplant	14	68	37	186	negative	0.032	negative	0	negative	negative
F	negative	positive	negative	negative	negative	negative	positive		54.1342	Bone marrow transplant	7	32	29	64	negative	0.932	negative	0.022	negative	negative
F									53.9836	Solid organ transplant	4.9	29	15	12	positive	24.084	positive	18.969	negative	negative
F									54.0219	Solid organ transplant	4.9	29	15	12	positive	24.084	positive	18.969	negative	negative
M				negative		negative			71.063	Hematologic malignancy	20	233	163	145	positive	21.457	negative	0	negative	negative
M				negative		negative			73.0027	Hematologic malignancy	16	405	143	124	negative	0.021	negative	0.012	negative	negative
M				negative		negative			40.1644	Bone marrow transplant	21.8	309	25	108	negative	0.058	negative	0.004	negative	negative
M	negative	negative	negative	negative	negative	negative	positive		62.6877	Hematologic malignancy	9.2	90	26	49	positive	23.949	negative	0.004	negative	negative
F									33.2959	Solid organ transplant	4.8	99	35	30	negative	0.032	negative	0.004	negative	negative
M	negative	positive	negative		positive	negative			26.9178	Solid organ transplant	6.8	34	30	48	negative	0.005	negative	0.007	negative	negative
M				negative		negative			67.5863	Bone marrow transplant	10	147	41	119	negative	0.411	negative	0.008	negative	negative
M				negative		negative			67.6466	Bone marrow transplant	9	163	40	88	negative	0.411	negative	0.008	negative	negative
F	negative	positive	negative		negative			negative	19.7233	Hematologic malignancy	14.6	45	30	172	positive	5.589	negative	0.037	negative	negative
F	negative	positive	negative		negative				61.3863	Solid organ transplant	3.4	16	21	16	positive	1.663	negative	0.015	negative	negative
F	negative	negative	negative		negative				57.8959	Solid organ transplant	3.5	81	22	28	negative	0.032	negative	0.031	negative	negative
M	negative	negative	negative		negative		positive		70.5014	Hematologic malignancy	9.5	109	18	12	positive	2.395	negative	0.055	negative	negative
M	negative	negative	negative		negative		positive		70.6	Hematologic malignancy	105	281	78	92	positive	2.395	negative	0.055	negative	negative
M	negative	positive	negative	negative	negative	negative			64.3342	Bone marrow transplant	6.9	33	14	20	negative	0.337	negative	0.000	negative	negative
F	negative	positive	negative		negative		positive		68.2356	Bone marrow transplant	27	294	27	26	positive	25.499	negative	0.15	negative	negative
F	negative	positive	negative		negative		positive		68.7397	Bone marrow transplant	8	239	18	22	negative	0.026	negative	0.022	negative	negative
M	negative	positive	negative		negative		positive		64.8712	Bone marrow transplant	17.8	30	27	22	positive	2.532	negative	0.015	negative	negative
F				negative		negative			25.074	Solid organ transplant	29.4	190	81	101	positive	10.447	negative	0.090	negative	negative
M	negative	positive	negative		negative		positive		71.1151	Hematologic malignancy	23	28	21	27	negative	0.116	negative	0.022	negative	negative
M	negative	positive	negative		negative		positive		70.7233	Bone marrow transplant	24	58	22	27	positive	20.384	negative	0.166	negative	negative
M									75.8548	Hematologic malignancy	13.5	119	32	54	negative	0.516	negative	0.011	negative	negative
F	negative	positive	negative		negative		positive	negative	56.589	Bone marrow transplant	10.8	89	15	13	negative	0.005	negative	0.026	negative	negative
F	negative	positive	negative		negative		positive		53.326	Bone marrow transplant	191.7	1433	164	262	positive	15.091	negative	0.022	negative	negative
F				negative		negative			32.7233	Bone marrow transplant	9	86	53	65	negative	0.021	negative	0.008	negative	negative
F	negative	positive	positive	negative	positive	positive			57.8795	Cirrhosis	128.5	299	163	83	negative	0.105	negative	0.004	negative	negative
F	negative	negative	negative		negative				45.6192	Solid organ transplant	9.1	17	12	12	positive	16.556	negative	0.012	negative	negative
F	negative	negative	negative		negative				68.1671	Solid cancer	3	106	41	23	negative	0.016	negative	0.008	negative	negative
F	negative	negative	negative		negative		positive	negative	43.6603	Hematologic malignancy	2.5	76	25	32	positive	4.737	negative	0.185	negative	negative
M				negative		negative			65.3233	Bone marrow transplant	8	561	133	273	positive	2.289	negative	0.05	negative	negative
M	negative	negative	negative	negative	negative				47.0192	Cirrhosis	315.9	93	101	33	positive	19.537	negative	0.509	negative	negative
M	negative	negative	negative	negative	negative				47.0493	Cirrhosis	216.7	157	152	114	positive	19.357	negative	0.509	negative	negative
F	negative	negative	negative		negative				59.9452	Solid organ transplant	7.9	78	23	22	positive	26.678	positive	4.177	negative	negative
F									21	Corticosteroid treatment				582	negative		negative		negative	negative
F									21	Corticosteroid treatment				582	negative		negative		negative	negative
M	negative	positive	negative		negative		negative		49.611	Hematologic malignancy	6	121	27	42	negative	0	negative	0.011	negative	negative
F	negative	positive	negative		negative		positive		40.9315	Bone marrow transplant	10.1	115	12	29	negative	0.147	negative	0.011	negative	negative
M	negative	positive	negative		negative				38.7644	Solid organ transplant	4.5	89	22	25	positive	10.168	negative	0.008	negative	negative
M	negative	negative	negative	negative	negative	negative			17.4548	Bone marrow transplant	9.9	51	62	133	negative	0.005	negative	0.004	negative	negative
F	negative	positive	negative	negative	negative	negative	positive		68.6712	Bone marrow transplant	11	160	50	176	negative	0.726	negative	0.018	negative	negative
